# Supplementary material for: Rheumatoid arthritis, TNF inhibitors, and non-melanoma skin cancer
Source: HighWire-hosted journal article supplement (doi:10.1136/bmj.i472), 2016-01-28
Supplement: bmj.i472.pdf [file bmj.i472.pdf]

## 类风湿关节炎、肿瘤坏死因子抑制剂 及非黑色素瘤皮肤癌

多数额外风险与疾病相关,而非治疗

### Rheumatoid arthritis, TNF inhibitors, and non-melanoma skin cancer

Most of the excess risk is related to the disease, not the treatment

来源:BMJ 2016;352:i472 doi: 10.1136/bmj.i472

基底细胞癌(BCC)和鳞状细胞癌(SCC)是两种最常见的非黑色素瘤皮肤癌类型。流行病学研究表明,类风湿关节炎患者的非黑色素瘤皮肤癌发病率高于普通人群<sup>1,2</sup>。这就引起人们对于免疫抑制治疗导致这些恶性肿瘤发病率增加的担忧,特别是当器官移植并伴随使用免疫抑制剂时,与SCC呈强相关,而与BCC的相关程度相对较小<sup>3,4</sup>。肿瘤坏死因子(TNF)抑制剂是最常用的治疗类风湿关节炎的生物免疫抑制剂。来自74个随机对照试验的汇总数据表明,TNF抑制剂与非黑色素瘤皮肤癌的风险增加相关,其增加的风险高于类风湿关节炎疾病本身增加的风险<sup>5</sup>。几项大型的观察性研究支持这一发现<sup>6,7</sup>,但其他研究则不支持此观点<sup>8-10</sup>。多数研究将SCC和BCC患者分组在一起合并分析,或者仅纳入了较少例数的SCC患者。

在瑞典的一项大规模研究中(doi: 10.1136/bmj.i262,摘要见本期第63页),Raaschou及其同事们报告了未应用生物制剂和接受TNF抑制剂治疗类风湿关节炎患者的SCC和BCC发病风险<sup>11</sup>。瑞典的医疗体系是由税收支付的全民医疗服

务。并且它还提供了高质量的国家人口数据信息、临床诊断和药物使用注册登记,允许获取个人层面的信息。在这些登记库中,包括一个全国性癌症登记库——实行皮肤癌强制登记制度并经过病理科半自动化上报。通过数据链接来利用这些宝贵的资源,作者能够在研究期间分析瑞典绝大多数类风湿关节炎患者的情况。重要的是,他们分别调查了SCC(>1 000例)和BCC(>1 800例)患者,而且进一步将SCC患者分为原位性和浸润性病组。通过上述方法,对这些恶性肿瘤进行可靠的、单独的风险评估。将其发病率与相匹配的一般人群中观察到的发病率进行比较。为了说明紫外线暴露的差异,将居住区域作为匹配项纳入研究。

Raaschou及其同事们发现,在未应用生物制剂的类风湿关节炎患者中,SCC的发病风险接近一般人群的2倍,BCC的发病风险增加了22%。与未应用生物治疗的患者相比,应用TNF抑制剂患者的SCC发病风险增加了30%,而在校正混杂因素后发现,BCC的发病风险增加较小且并不显著。原位SCC和浸润性SCC的发病风险相似。与器官移植方面的文献数据

Shervin Assassi  
associate professor

University of Texas  
Health Science  
Center at Houston,  
6431 Fannin, MSB  
5.266,  
Houston, TX  
77030, USA

Correspondence to:  
shervin.assassi@uth.  
tmc.edu

郭军华 译  
王一雯 校  
黄烽 校  
解放军总医院  
风湿科

一致, TNF 抑制剂对 SCC 发病风险的影响比对 BCC 发病风险的影响更大, 但是总体风险, 即便是 SCC 的发病风险, 也仅是中度增加。假设两者存在因果关系, 那么每年每 1 600 例应用 TNF 抑制剂的患者当中将额外增加 1 例 SCC 患者。

上述研究主要的方法学缺陷是作者无法校正疾病的严重程度。具有较严重的关节炎患者更加可能接受 TNF 抑制剂治疗。如果关节炎的严重程度与非黑色素瘤皮肤癌的风险相关, 则该研究结局受到了用药指征的混杂。在此观察性研究中, 患者没有被随机分配到治疗中, 因此任何风险的增加都可能是由于疾病的严重程度增加导致的, 而非治疗导致的。

本研究没有设计用来探讨 5 种不同的 TNF 抑制剂(阿达木单抗、赛妥珠单抗、依那西普、戈利木单抗和英夫利西单抗)之间的差异。推广性也可能受到限制。由于排除了银屑病关节炎或强直性脊柱炎等患者, 此研究结果不能推测到因其他适应证应用 TNF 抑制剂的患者。将该数据推测到瑞典以外的人群时也应谨慎, 因为紫外线暴露和肤色等其他风险因素的存在<sup>12</sup>, 可能导致其他人群的情况与 Raaschou 及其同事们所报告的情况不同。

这项研究提供了进一步的有力证据表明, 类风湿关节炎患者非黑色素瘤皮肤癌的发病风险增加。应用 TNF 抑制剂与中度增加的 SCC 发病风险相关, 但是大多数风险源于其他因素, 这其中包括疾病本身。因此, 所有类风湿关节炎患者, 无论应用何种治疗, 都有可能通过加强监测皮肤癌而获益, 并且医生应该建议患者保护自己免受日晒<sup>13</sup>。

利益竞争 (Competing interests): I have read and understood the BMJ policy on declaration of interests and declare the following interests: I have given paid advice to Biogen and Boehringer Ingelheim about systemic sclerosis and received support from Biogen and Bayer for research into systemic sclerosis. None of these pharmaceutical companies make or market TNF inhibitors.

来源及同行评议 (Provenance and peer review): Commissioned; not peer reviewed.

## 参考文献

- 1 Askling J, Forel CM, Brandt L, et al. Risks of solid cancers in patients with rheumatoid arthritis and after treatment with tumour

necrosis factor antagonists. *Ann Rheum Dis* 2005;64:1421-6. doi:10.1136/ard.2004.033993.15829572.

- 2 Mellekjaer L, Linet MS, Gridley G, Frisch M, Møller H, Olsen JH. Rheumatoid arthritis and cancer risk. *Eur J Cancer* 1996;32A:1753-7. doi:10.1016/0959-8049(96)00210-9. 8983286.
- 3 Adami J, Gäbel H, Lindelöf B, et al. Cancer risk following organ transplantation: a nationwide cohort study in Sweden. *Br J Cancer* 2003;89:1221-7. doi:10.1038/sj.bjc.6601219.14520450.
- 4 Hartvelt MM, Bavinck JN, Kootte AM, Vermeer BJ, Vandenbroucke JP. Incidence of skin cancer after renal transplantation in The Netherlands. *Transplantation* 1990;49:506-9. doi:10.1097/00007890-199003000-00006.2316011.
- 5 Askling J, Fahrback K, Nordstrom B, Ross S, Schmid CH, Symmons D. Cancer risk with tumor necrosis factor alpha (TNF) inhibitors: meta-analysis of randomized controlled trials of adalimumab, etanercept, and infliximab using patient level data. *Pharmacoepidemiol Drug Saf* 2011;20:119-30. doi:10.1002/pds.2046.21254282.
- 6 Amari W, Zeringue AL, McDonald JR, Caplan L, Eisen SA, Ranganathan P. Risk of non-melanoma skin cancer in a national cohort of veterans with rheumatoid arthritis. *Rheumatology (Oxford)* 2011;50:1431-9. doi:10.1093/rheumatology/ker113.21415022.
- 7 Wolfe F, Michaud K. Biologic treatment of rheumatoid arthritis and the risk of malignancy: analyses from a large US observational study. *Arthritis Rheum* 2007;56:2886-95. doi:10.1002/art.22864.17729297.
- 8 Mercer LK, Green AC, Galloway JB, et al. British Society for Rheumatology Biologics Register Control Centre Consortium British Society for Rheumatology Biologics Register. The influence of anti-TNF therapy upon incidence of keratinocyte skin cancer in patients with rheumatoid arthritis: longitudinal results from the British Society for Rheumatology Biologics Register. *Ann Rheum Dis* 2012;71:869-74. doi:10.1136/annrheumdis-2011-200622.22241900.
- 9 Dreyer L, Mellekjaer L, Andersen AR, et al. Incidences of overall and site specific cancers in TNF $\alpha$  inhibitor treated patients with rheumatoid arthritis and other arthritides - a follow-up study from the DANBIO Registry. *Ann Rheum Dis* 2013;72:79-82. doi:10.1136/annrheumdis-2012-201969.22945500.
- 10 Haynes K, Beukelman T, Curtis JR, et al. SABER Collaboration. Tumor necrosis factor  $\alpha$  inhibitor therapy and cancer risk in chronic immune-mediated diseases. *Arthritis Rheum* 2013;65:48-58. doi:10.1002/art.37740.23055441.
- 11 Raaschou P, Hagelberg A, Simard J, Askling J. ARTIS Study Group. Rheumatoid arthritis, anti-tumour necrosis factor treatment, and risk of squamous cell and basal cell skin cancer: cohort study based on nationwide prospectively recorded data from Sweden. *BMJ* 2016;352:i262.
- 12 Armstrong BK, Kricger A. The epidemiology of UV induced skin cancer. *J Photochem Photobiol B* 2001;63:8-18. doi:10.1016/S1011-1344(01)00198-1.11684447.
- 13 Green A, Williams G, Neale R, et al. Daily sunscreen application and betacarotene supplementation in prevention of basal-cell and squamous-cell carcinomas of the skin: a randomised controlled trial. *Lancet* 1999;354:723-9. doi:10.1016/S0140-6736(98)12168-2.10475183.

BMJ takes no responsibility for the accuracy of the translation from the published English language original and is not liable for any errors that may occur.
